# Supplementary material for: Synergism of ursolic acid and cisplatin promotes apoptosis and enhances growth inhibition of cervical cancer cells via suppressing NF-κB p65
Source: PubMed Central journal article supplement (PMC5722573; doi:10.18632/oncotarget.22133), 2017-10-30
Supplement: oncotarget-08-97416-s001.pdf [file oncotarget-08-97416-s001.pdf]

## Synergism of ursolic acid and cisplatin promotes apoptosis and enhances growth inhibition of cervical cancer cells via suppressing NF- $\kappa$ B p65

### SUPPLEMENTARY MATERIALS

**Supplementary Table 1: The percentage of apoptotic cells**

| Group   | 1     | 2     | 3     | 4     | 5     | 6     | Mean $\pm$ SD                     |
|---------|-------|-------|-------|-------|-------|-------|-----------------------------------|
| Control | 13.78 | 13.45 | 13.66 | 13.37 | 13.20 | 12.78 | 13.37 $\pm$ 0.36                  |
| DDP     | 37.80 | 37.69 | 39.63 | 38.52 | 36.74 | 39.52 | 38.32 $\pm$ 1.13**                |
| UA      | 24.85 | 31.04 | 29.84 | 29.35 | 31.78 | 32.08 | 29.82 $\pm$ 2.66***               |
| DDP+UA  | 60.32 | 62.13 | 55.38 | 59.43 | 59.44 | 57.85 | 59.09 $\pm$ 2.29*** <sup>oo</sup> |

Results (mean  $\pm$  SD) were from six independent experiments. \*\* P < 0.01 versus control group; # P < 0.01 compared with the DDP group; <sup>oo</sup> P < 0.01 compared with the UA group. DDP: cisplatin; UA: ursolic acid.

**Supplementary Table 2: The quantifications of the protein expression levels**

| Group   | Protein       | 1    | 2    | 3    | 4    | 5    | 6    | Mean $\pm$ SD                    |
|---------|---------------|------|------|------|------|------|------|----------------------------------|
| Control | Caspase-3     | 0.79 | 0.89 | 1.09 | 0.75 | 1.09 | 1.40 | 1.00 $\pm$ 0.24                  |
|         | Bcl-2         | 1.46 | 1.09 | 0.85 | 0.59 | 0.88 | 1.12 | 1.00 $\pm$ 0.30                  |
|         | Bax           | 1.04 | 1.22 | 1.08 | 0.82 | 1.00 | 0.87 | 1.00 $\pm$ 0.15                  |
|         | PARP          | 1.00 | 1.14 | 0.92 | 1.29 | 0.78 | 0.91 | 1.00 $\pm$ 0.18                  |
|         | PARP cleavage | 1.16 | 1.04 | 0.81 | 0.95 | 1.02 | 1.01 | 1.00 $\pm$ 0.12                  |
| DDP     | Caspase-3     | 1.71 | 2.03 | 2.57 | 1.98 | 2.07 | 2.14 | 2.08 $\pm$ 0.28**                |
|         | Bcl-2         | 0.48 | 0.48 | 0.44 | 0.57 | 0.54 | 0.45 | 0.49 $\pm$ 0.05*                 |
|         | Bax           | 1.65 | 1.82 | 2.51 | 2.14 | 1.90 | 1.56 | 1.93 $\pm$ 0.35**                |
|         | PARP          | 0.81 | 1.00 | 0.95 | 1.04 | 0.92 | 0.74 | 0.91 $\pm$ 0.11                  |
|         | PARP cleavage | 2.09 | 1.91 | 1.74 | 2.01 | 1.84 | 1.55 | 1.86 $\pm$ 0.20**                |
| UA      | Caspase-3     | 1.67 | 1.24 | 1.61 | 1.49 | 1.51 | 1.44 | 1.49 $\pm$ 0.15***               |
|         | Bcl-2         | 0.48 | 1.01 | 0.87 | 0.47 | 0.78 | 0.69 | 0.72 $\pm$ 0.21*#                |
|         | Bax           | 1.56 | 1.40 | 1.64 | 1.30 | 1.49 | 1.63 | 1.50 $\pm$ 0.13***               |
|         | PARP          | 1.16 | 0.83 | 0.99 | 0.82 | 1.01 | 0.91 | 0.95 $\pm$ 0.13                  |
|         | PARP cleavage | 1.46 | 1.24 | 1.61 | 1.55 | 1.44 | 1.54 | 1.47 $\pm$ 0.13***               |
| DDP+UA  | Caspase-3     | 2.82 | 2.92 | 3.25 | 2.18 | 3.01 | 3.46 | 2.94 $\pm$ 0.44*** <sup>oo</sup> |
|         | Bcl-2         | 0.19 | 0.31 | 0.25 | 0.25 | 0.24 | 0.32 | 0.26 $\pm$ 0.05*** <sup>oo</sup> |
|         | Bax           | 2.69 | 2.37 | 2.59 | 3.15 | 2.55 | 2.57 | 2.66 $\pm$ 0.27*** <sup>oo</sup> |
|         | PARP          | 0.80 | 0.92 | 1.06 | 0.68 | 0.90 | 0.96 | 0.89 $\pm$ 0.13                  |
|         | PARP cleavage | 2.34 | 2.72 | 1.99 | 2.27 | 2.07 | 2.19 | 2.26 $\pm$ 0.26*** <sup>oo</sup> |

Results (mean  $\pm$  SD) were from six independent experiments. \* P < 0.05, \*\* P < 0.01 versus the control group; # P < 0.05, \*\*\* P < 0.01 compared with the DDP group; <sup>o</sup> P < 0.05, <sup>oo</sup> P < 0.01 compared with the UA group. DDP: cisplatin; UA: ursolic acid.

**Supplementary Table 3: The quantifications of expression levels of p21, cyclin E and D1**

| Group   | Protein   | 1    | 2    | 3    | 4    | 5    | 6    | Mean ± SD      |
|---------|-----------|------|------|------|------|------|------|----------------|
| Control | P21       | 1.03 | 1.13 | 0.84 | 1.04 | 0.81 | 1.15 | 1.00±0.14      |
|         | Cyclin E  | 0.90 | 1.18 | 0.94 | 1.00 | 0.91 | 1.08 | 1.00±0.11      |
|         | Cyclin D1 | 0.84 | 0.96 | 1.19 | 1.04 | 0.97 | 0.99 | 1.00±0.11      |
| DDP     | P21       | 2.41 | 2.56 | 2.82 | 2.24 | 2.08 | 2.14 | 2.42±0.29**    |
|         | Cyclin E  | 0.47 | 0.51 | 0.48 | 0.44 | 0.36 | 0.43 | 0.45±0.05**    |
|         | Cyclin D1 | 0.58 | 0.62 | 0.55 | 0.52 | 0.43 | 0.55 | 0.54±0.07*     |
| UA      | P21       | 1.92 | 2.43 | 1.93 | 2.06 | 1.89 | 1.92 | 2.05±0.22***   |
|         | Cyclin E  | 0.71 | 0.67 | 0.63 | 0.72 | 0.81 | 0.78 | 0.71±0.07***   |
|         | Cyclin D1 | 0.56 | 0.72 | 0.78 | 0.74 | 0.79 | 0.75 | 0.72±0.09*#    |
| DDP+UA  | P21       | 3.20 | 2.70 | 3.57 | 2.48 | 2.86 | 3.09 | 2.96±0.43**#°° |
|         | Cyclin E  | 0.21 | 0.21 | 0.19 | 0.20 | 0.24 | 0.26 | 0.21±0.02**#°° |
|         | Cyclin D1 | 0.29 | 0.27 | 0.33 | 0.27 | 0.31 | 0.26 | 0.30±0.03***°  |

Results (mean ± SD) were from six independent experiments. \* P < 0.05, \*\* P < 0.01 versus the control group; # P < 0.05, ## P < 0.01 compared with the DDP group; ° P < 0.05, °° P < 0.01 compared with the UA group. DDP: cisplatin; UA: ursolic acid.

**Supplementary Table 4: The quantifications of the nuclear p65 expressions**

| Group   | 1    | 2    | 3    | 4    | 5    | 6    | Mean ± SD     |
|---------|------|------|------|------|------|------|---------------|
| Control | 1.02 | 0.90 | 0.96 | 1.25 | 0.95 | 0.94 | 1.00±0.13     |
| DDP     | 1.12 | 1.25 | 1.46 | 1.14 | 1.44 | 1.16 | 1.26±0.15**   |
| UA      | 0.63 | 0.46 | 0.43 | 0.60 | 0.44 | 0.69 | 0.54±0.11***  |
| DDP+UA  | 0.74 | 0.90 | 0.93 | 0.78 | 0.69 | 0.65 | 0.78±0.11***° |

Results (mean ± SD) were from six independent experiments. \* P < 0.05, \*\* P < 0.01 versus the control group; # P < 0.05, ## P < 0.01 compared with the DDP group; ° P < 0.05, °° P < 0.01 compared with the UA group. DDP: cisplatin; UA: ursolic acid.
